# Supplementary material for: Invasion Genetics of the Horse-Chestnut Leaf Miner, Cameraria ohridella (Lepidoptera: Gracillariidae), in European Russia: A Case of Successful Involvement of Citizen Science in Studying an Alien Insect Pest
Source: MDPI journal article supplement (doi:10.3390/insects14020117), 2023-01-24
Supplement: s1 [file s1]

# The Invasion Genetics of the Horse-Chestnut Leaf Miner, *Cameraria ohridella* (Lepidoptera: Gracillariidae), in European Russia: the Case of Successful Involvement of Citizen Science in Studying an Alien Insect Pest

**AUTHORS:** Natalia I. Kirichenko, Natalia N. Karpun, Elena N. Zhuravleva, Elena I. Shoshina, Vasily V. Anikin, Dmitrii L. Musolin

**Table S1.** The specimens of *Cameraria ohridella* from the European part of Russia involved into molecular genetic analysis and the species sequences borrowed from BOLD for comparison. For each specimen, sample ID and process ID are provided, linking the records in the BOLD database with the voucher specimen data.

| No.                                      | Sample ID | Process ID  | Country | Region          | Place      | Collection data | Collector   | GenBank Accession |
|------------------------------------------|-----------|-------------|---------|-----------------|------------|-----------------|-------------|-------------------|
| Specimens sequenced in the present study |           |             |         |                 |            |                 |             |                   |
| 1.                                       | NK-20-41  | GPRU090-21  | Russia  | Adygeya Rep.    | Maykop     | 25-Jun-2021     | Demidko D.  | MZ329804          |
| 2.                                       | NK1024    | CAMRU109-21 | Russia  | Belgorod Oblast | Belgorod   | 18-Jul-2021     | Stuchaev V. | OQ079082          |
| 3.                                       | NK1025    | CAMRU110-21 | Russia  | Belgorod Oblast | Belgorod   | 18-Jul-2021     | Stuchaev V. | OQ079006          |
| 4.                                       | NK1091    | CAMRU176-21 | Russia  | Belgorod Oblast | Belgorod   | 18-Jul-2021     | Stuchaev V. | OQ078930          |
| 5.                                       | NK1092    | CAMRU177-21 | Russia  | Belgorod Oblast | Belgorod   | 18-Jul-2021     | Stuchaev V. | OQ078947          |
| 6.                                       | NK1045    | CAMRU130-21 | Russia  | Bryansk Oblast  | Bryansk    | 11-Jul-2021     | unknown     | OQ079069          |
| 7.                                       | NK1046    | CAMRU131-21 | Russia  | Bryansk Oblast  | Bryansk    | 11-Jul-2021     | unknown     | OQ078950          |
| 8.                                       | NK1048    | CAMRU133-21 | Russia  | Bryansk Oblast  | Bryansk    | 11-Jul-2021     | unknown     | OQ079037          |
| 9.                                       | NK1095    | CAMRU180-21 | Russia  | Bryansk Oblast  | Bryansk    | 11-Jul-2021     | unknown     | OQ078997          |
| 10.                                      | NK1096    | CAMRU181-21 | Russia  | Bryansk Oblast  | Bryansk    | 11-Jul-2021     | unknown     | OQ078955          |
| 11.                                      | NK1011    | CAMRU096-21 | Russia  | Chuvashia Rep.  | Cheboksary | 03-Aug-2021     | Smirnova N. | OQ078954          |
| 12.                                      | NK1012    | CAMRU097-21 | Russia  | Chuvashia Rep.  | Cheboksary | 03-Aug-2021     | Smirnova N. | OQ078953          |
| 13.                                      | NK1013    | CAMRU098-21 | Russia  | Chuvashia Rep.  | Cheboksary | 03-Aug-2021     | Smirnova N. | OQ078932          |
| 14.                                      | NK1081    | CAMRU166-21 | Russia  | Chuvashia Rep.  | Cheboksary | 03-Aug-2021     | Smirnova N. | OQ079031          |
| 15.                                      | NK1017    | CAMRU102-21 | Russia  | Crimea Rep.     | Koktebel   | 13-Jul-2021     | Smirnova N. | OQ079064          |
| 16.                                      | NK1018    | CAMRU103-21 | Russia  | Crimea Rep.     | Koktebel   | 13-Jul-2021     | Smirnova N. | OQ078958          |
| 17.                                      | NK1019    | CAMRU104-21 | Russia  | Crimea Rep.     | Koktebel   | 13-Jul-2021     | Smirnova N. | OQ079046          |

| No. | Sample ID | Process ID  | Country | Region                   | Place       | Collection data | Collector                | GenBank Accession |
|-----|-----------|-------------|---------|--------------------------|-------------|-----------------|--------------------------|-------------------|
| 18. | NK1084    | CAMRU169-21 | Russia  | Crimea Rep.              | Koktebel    | 13-Jul-2021     | Smirnova N.              | OQ079100          |
| 19. | NK1085    | CAMRU170-21 | Russia  | Crimea Rep.              | Koktebel    | 13-Jul-2021     | Smirnova N.              | OQ079049          |
| 20. | NK-20-43  | GPRU092-21  | Russia  | Crimea Rep.              | Feodosia    | 20-Aug-2017     | Akulov E.                | MZ329805          |
| 21. | NK1041    | CAMRU126-21 | Russia  | Dagestan Rep.            | Makhachkala | 07-Jul-2021     | Ilina E.                 | OQ079016          |
| 22. | NK1042    | CAMRU127-21 | Russia  | Dagestan Rep.            | Makhachkala | 07-Jul-2021     | Ilina E.                 | OQ079027          |
| 23. | NK1043    | CAMRU128-21 | Russia  | Dagestan Rep.            | Makhachkala | 07-Jul-2021     | Ilina E.                 | OQ078981          |
| 24. | NK1044    | CAMRU129-21 | Russia  | Dagestan Rep.            | Makhachkala | 07-Jul-2021     | Ilina E.                 | OQ079094          |
| 25. | NK1080    | CAMRU165-21 | Russia  | Dagestan Rep.            | Makhachkala | 07-Jul-2021     | Ilina E.                 | OQ079097          |
| 26. | NK997     | CAMRU082-21 | Russia  | Kabardino-Balkaria Rep.  | Nalchik     | 08-Jun-2021     | Akulov E.                | OQ078943          |
| 27. | NK998     | CAMRU083-21 | Russia  | Kabardino-Balkaria Rep.  | Nalchik     | 08-Jun-2021     | Akulov E.                | OQ079063          |
| 28. | NK999     | CAMRU084-21 | Russia  | Kabardino-Balkaria Rep.  | Nalchik     | 08-Jun-2021     | Akulov E.                | OQ078921          |
| 29. | NK1029    | CAMRU114-21 | Russia  | Kaliningrad Oblast       | Kaliningrad | 17-Jul-2021     | Didorenko V.             | OQ079071          |
| 30. | NK1030    | CAMRU115-21 | Russia  | Kaliningrad Oblast       | Kaliningrad | 17-Jul-2021     | Didorenko V.             | OQ079017          |
| 31. | NK1031    | CAMRU116-21 | Russia  | Kaliningrad Oblast       | Kaliningrad | 17-Jul-2021     | Didorenko V.             | OQ079058          |
| 32. | NK1089    | CAMRU174-21 | Russia  | Kaliningrad Oblast       | Kaliningrad | 17-Jul-2021     | Didorenko V.             | OQ079033          |
| 33. | NK1090    | CAMRU175-21 | Russia  | Kaliningrad Oblast       | Kaliningrad | 17-Jul-2021     | Didorenko V.             | OQ079095          |
| 34. | NK941     | CAMRU026-21 | Russia  | Karachay-Cherkessia Rep. | Cherkessk   | 10-Aug-2021     | Kirichenko N., Karpun N. | OQ079045          |
| 35. | NK942     | CAMRU027-21 | Russia  | Karachay-Cherkessia Rep. | Cherkessk   | 10-Aug-2021     | Kirichenko N., Karpun N. | OQ078991          |
| 36. | NK943     | CAMRU028-21 | Russia  | Karachay-Cherkessia Rep. | Cherkessk   | 10-Aug-2021     | Kirichenko N., Karpun N. | OQ078972          |
| 37. | NK977     | CAMRU062-21 | Russia  | Krasnodar Krai           | Anapa       | 09-Aug-2021     | Kirichenko N., Karpun N. | OQ079074          |
| 38. | NK978     | CAMRU063-21 | Russia  | Krasnodar Krai           | Anapa       | 09-Aug-2021     | Kirichenko N., Karpun N. | OQ078995          |
| 39. | NK979     | CAMRU064-21 | Russia  | Krasnodar Krai           | Anapa       | 09-Aug-2021     | Kirichenko N., Karpun N. | OQ078977          |
| 40. | NK950     | CAMRU035-21 | Russia  | Krasnodar Krai           | Apsheronsk  | 11-Aug-2021     | Kirichenko N., Karpun N. | OQ079042          |
| 41. | NK951     | CAMRU036-21 | Russia  | Krasnodar Krai           | Apsheronsk  | 11-Aug-2021     | Kirichenko N., Karpun N. | OQ079068          |

| No. | Sample ID | Process ID  | Country | Region         | Place            | Collection data | Collector                | GenBank Accession |
|-----|-----------|-------------|---------|----------------|------------------|-----------------|--------------------------|-------------------|
| 42. | NK952     | CAMRU037-21 | Russia  | Krasnodar Krai | Apsheronsk       | 11-Aug-2021     | Kirichenko N., Karpun N. | OQ079043          |
| 43. | NK974     | CAMRU059-21 | Russia  | Krasnodar Krai | Arkhipo-Osipovka | 09-Aug-2021     | Kirichenko N., Karpun N. | OQ078983          |
| 44. | NK975     | CAMRU060-21 | Russia  | Krasnodar Krai | Arkhipo-Osipovka | 09-Aug-2021     | Kirichenko N., Karpun N. | OQ079085          |
| 45. | NK976     | CAMRU061-21 | Russia  | Krasnodar Krai | Arkhipo-Osipovka | 09-Aug-2021     | Kirichenko N., Karpun N. | OQ079010          |
| 46. | NK931     | CAMRU016-21 | Russia  | Krasnodar Krai | Armavir          | 11-Aug-2021     | Kirichenko N., Karpun N. | OQ078993          |
| 47. | NK932     | CAMRU017-21 | Russia  | Krasnodar Krai | Armavir          | 11-Aug-2021     | Kirichenko N., Karpun N. | OQ079055          |
| 48. | NK933     | CAMRU018-21 | Russia  | Krasnodar Krai | Armavir          | 11-Aug-2021     | Kirichenko N., Karpun N. | OQ079078          |
| 49. | NK971     | CAMRU056-21 | Russia  | Krasnodar Krai | Gelendzhik       | 09-Aug-2021     | Kirichenko N., Karpun N. | OQ079047          |
| 50. | NK972     | CAMRU057-21 | Russia  | Krasnodar Krai | Gelendzhik       | 09-Aug-2021     | Kirichenko N., Karpun N. | OQ078985          |
| 51. | NK973     | CAMRU058-21 | Russia  | Krasnodar Krai | Gelendzhik       | 09-Aug-2021     | Kirichenko N., Karpun N. | OQ078963          |
| 52. | NK959     | CAMRU044-21 | Russia  | Krasnodar Krai | Khadyzhensk      | 11-Aug-2021     | Kirichenko N., Karpun N. | OQ079088          |
| 53. | NK960     | CAMRU045-21 | Russia  | Krasnodar Krai | Khadyzhensk      | 11-Aug-2021     | Kirichenko N., Karpun N. | OQ078920          |
| 54. | NK961     | CAMRU046-21 | Russia  | Krasnodar Krai | Khadyzhensk      | 11-Aug-2021     | Kirichenko N., Karpun N. | OQ079039          |
| 55. | NK916     | CAMRU001-21 | Russia  | Krasnodar Krai | Khopersky        | 10-Aug-2021     | Kirichenko N., Karpun N. | OQ078980          |
| 56. | NK917     | CAMRU002-21 | Russia  | Krasnodar Krai | Khopersky        | 10-Aug-2021     | Kirichenko N., Karpun N. | OQ078969          |
| 57. | NK918     | CAMRU003-21 | Russia  | Krasnodar Krai | Khopersky        | 10-Aug-2021     | Kirichenko N., Karpun N. | OQ079104          |
| 58. | NK986     | CAMRU071-21 | Russia  | Krasnodar Krai | Krasnodar        | 09-Aug-2021     | Kirichenko N., Karpun N. | OQ079025          |
| 59. | NK987     | CAMRU072-21 | Russia  | Krasnodar Krai | Krasnodar        | 09-Aug-2021     | Kirichenko N., Karpun N. | OQ078966          |
| 60. | NK988     | CAMRU073-21 | Russia  | Krasnodar Krai | Krasnodar        | 09-Aug-2021     | Kirichenko N., Karpun N. | OQ078990          |
| 61. | NK953     | CAMRU038-21 | Russia  | Krasnodar Krai | Kropotkin        | 10-Aug-2021     | Kirichenko N., Karpun N. | OQ079023          |
| 62. | NK954     | CAMRU039-21 | Russia  | Krasnodar Krai | Kropotkin        | 10-Aug-2021     | Kirichenko N., Karpun N. | OQ078919          |
| 63. | NK955     | CAMRU040-21 | Russia  | Krasnodar Krai | Kropotkin        | 10-Aug-2021     | Kirichenko N., Karpun N. | OQ078933          |
| 64. | NK919     | CAMRU004-21 | Russia  | Krasnodar Krai | Labinsk          | 11-Aug-2021     | Kirichenko N., Karpun N. | OQ078942          |
| 65. | NK920     | CAMRU005-21 | Russia  | Krasnodar Krai | Labinsk          | 11-Aug-2021     | Kirichenko N., Karpun N. | OQ079081          |
| 66. | NK921     | CAMRU006-21 | Russia  | Krasnodar Krai | Labinsk          | 11-Aug-2021     | Kirichenko N., Karpun N. | OQ079075          |
| 67. | NK965     | CAMRU050-21 | Russia  | Krasnodar Krai | Maykop           | 11-Aug-2021     | Kirichenko N., Karpun N. | OQ079089          |
| 68. | NK966     | CAMRU051-21 | Russia  | Krasnodar Krai | Maykop           | 11-Aug-2021     | Kirichenko N., Karpun N. | OQ078948          |
| 69. | NK967     | CAMRU052-21 | Russia  | Krasnodar Krai | Maykop           | 11-Aug-2021     | Kirichenko N., Karpun N. | OQ078927          |

| No. | Sample ID | Process ID  | Country | Region         | Place                    | Collection data | Collector                  | GenBank Accession |
|-----|-----------|-------------|---------|----------------|--------------------------|-----------------|----------------------------|-------------------|
| 70. | NK938     | CAMRU023-21 | Russia  | Krasnodar Krai | Novomikhailovsky         | 09-Aug-2021     | Kirichenko N., Karpun N.   | OQ079040          |
| 71. | NK939     | CAMRU024-21 | Russia  | Krasnodar Krai | Novomikhailovsky         | 09-Aug-2021     | Kirichenko N., Karpun N.   | OQ079044          |
| 72. | NK940     | CAMRU025-21 | Russia  | Krasnodar Krai | Novomikhailovsky         | 09-Aug-2021     | Kirichenko N., Karpun N.   | OQ079066          |
| 73. | NK962     | CAMRU047-21 | Russia  | Krasnodar Krai | Novorossiysk             | 09-Aug-2021     | Kirichenko N., Karpun N.   | OQ079000          |
| 74. | NK963     | CAMRU048-21 | Russia  | Krasnodar Krai | Novorossiysk             | 09-Aug-2021     | Kirichenko N., Karpun N.   | OQ078914          |
| 75. | NK964     | CAMRU049-21 | Russia  | Krasnodar Krai | Novorossiysk             | 09-Aug-2021     | Kirichenko N., Karpun N.   | OQ079083          |
| 76. | NK989     | CAMRU074-21 | Russia  | Krasnodar Krai | Slavyansk-na-Kubani      | 09-Aug-2021     | Kirichenko N., Karpun N.   | OQ078937          |
| 77. | NK990     | CAMRU075-21 | Russia  | Krasnodar Krai | Slavyansk-na-Kubani      | 09-Aug-2021     | Kirichenko N., Karpun N.   | OQ078916          |
| 78. | NK991     | CAMRU076-21 | Russia  | Krasnodar Krai | Slavyansk-na-Kubani      | 09-Aug-2021     | Kirichenko N., Karpun N.   | OQ079029          |
| 79. | NK1103    | CAMRU188-21 | Russia  | Krasnodar Krai | Sochi                    | 21-Jun-2021     | Zhuravleva E., Shoshina E. | OQ078998          |
| 80. | NK1104    | CAMRU189-21 | Russia  | Krasnodar Krai | Sochi                    | 21-Jun-2021     | Zhuravleva E., Shoshina E. | OQ078999          |
| 81. | NK1007    | CAMRU092-21 | Russia  | Krasnodar Krai | Sochi, Adlersky district | 21-Jun-2021     | Zhuravleva E., Shoshina E. | OQ078965          |
| 82. | NK1008    | CAMRU093-21 | Russia  | Krasnodar Krai | Sochi, Adlersky district | 21-Jun-2021     | Zhuravleva E., Shoshina E. | OQ079070          |
| 83. | NK1009    | CAMRU094-21 | Russia  | Krasnodar Krai | Sochi, Adlersky district | 21-Jun-2021     | Zhuravleva E., Shoshina E. | OQ078934          |
| 84. | NK1004    | CAMRU089-21 | Russia  | Krasnodar Krai | Sochi, Central district  | 21-Jun-2021     | Zhuravleva E., Shoshina E. | OQ078952          |
| 85. | NK1005    | CAMRU090-21 | Russia  | Krasnodar Krai | Sochi, Central district  | 21-Jun-2021     | Zhuravleva E., Shoshina E. | OQ079084          |
| 86. | NK1006    | CAMRU091-21 | Russia  | Krasnodar Krai | Sochi, Central district  | 21-Jun-2021     | Zhuravleva E., Shoshina E. | OQ078940          |
| 87. | NK956     | CAMRU041-21 | Russia  | Krasnodar Krai | Stanitsa Pavlovskaya     | 10-Aug-2021     | Kirichenko N., Karpun N.   | OQ079053          |
| 88. | NK957     | CAMRU042-21 | Russia  | Krasnodar Krai | Stanitsa Pavlovskaya     | 10-Aug-2021     | Kirichenko N., Karpun N.   | OQ078984          |

| No.  | Sample ID | Process ID   | Country | Region           | Place                | Collection data | Collector                | GenBank Accession |
|------|-----------|--------------|---------|------------------|----------------------|-----------------|--------------------------|-------------------|
| 89.  | NK958     | CAMRU043-21  | Russia  | Krasnodar Krai   | Stanitsa Pavlovskaya | 10-Aug-2021     | Kirichenko N., Karpun N. | OQ078964          |
| 90.  | NK983     | CAMRU068-21  | Russia  | Krasnodar Krai   | Temryuk              | 09-Aug-2021     | Kirichenko N., Karpun N. | OQ079077          |
| 91.  | NK984     | CAMRU069-21  | Russia  | Krasnodar Krai   | Temryuk              | 09-Aug-2021     | Kirichenko N., Karpun N. | OQ079101          |
| 92.  | NK985     | CAMRU070-21  | Russia  | Krasnodar Krai   | Temryuk              | 09-Aug-2021     | Kirichenko N., Karpun N. | OQ079019          |
| 93.  | NK928     | CAMRU013-21  | Russia  | Krasnodar Krai   | Tihkoretsk           | 10-Aug-2021     | Kirichenko N., Karpun N. | OQ079007          |
| 94.  | NK929     | CAMRU014-21  | Russia  | Krasnodar Krai   | Tihkoretsk           | 10-Aug-2021     | Kirichenko N., Karpun N. | OQ079102          |
| 95.  | NK930     | CAMRU015-21  | Russia  | Krasnodar Krai   | Tihkoretsk           | 10-Aug-2021     | Kirichenko N., Karpun N. | OQ078925          |
| 96.  | NK980     | CAMRU065-21  | Russia  | Krasnodar Krai   | Tuapse               | 09-Aug-2021     | Kirichenko N., Karpun N. | OQ079105          |
| 97.  | NK981     | CAMRU066-21  | Russia  | Krasnodar Krai   | Tuapse               | 09-Aug-2021     | Kirichenko N., Karpun N. | OQ079001          |
| 98.  | NK982     | CAMRU067-21  | Russia  | Krasnodar Krai   | Tuapse               | 09-Aug-2021     | Kirichenko N., Karpun N. | OQ078917          |
| 99.  | NK1049    | CAMRU134-21  | Russia  | Krasnodar Krai   | Yeisk                | 30-Jul-2021     | Shestakova M.            | OQ078971          |
| 100. | NK1050    | CAMRU135-21  | Russia  | Krasnodar Krai   | Yeisk                | 30-Jul-2021     | Shestakova M.            | OQ079080          |
| 101. | NK1052    | CAMRU137-21  | Russia  | Krasnodar Krai   | Yeisk                | 30-Jul-2021     | Shestakova M.            | OQ079093          |
| 102. | NK1099    | CAMRU184-21  | Russia  | Krasnodar Krai   | Yeisk                | 30-Jul-2021     | Shestakova M.            | OQ079060          |
| 103. | NK1100    | CAMRU185-21  | Russia  | Krasnodar Krai   | Yeisk                | 30-Jul-2021     | Shestakova M.            | OQ079106          |
| 104. | NK1053    | CAMRU138-21  | Russia  | Leningrad Oblast | Saint Petersburg     | 10-Jul-2021     | Margirova M.             | OQ079011          |
| 105. | NK1054    | CAMRU139-21  | Russia  | Leningrad Oblast | Saint Petersburg     | 10-Jul-2021     | Margirova M.             | OQ079038          |
| 106. | NK1055    | CAMRU140-21  | Russia  | Leningrad Oblast | Saint Petersburg     | 09-Jul-2021     | Margirova M.             | OQ079028          |
| 107. | NK1056    | CAMRU141-21  | Russia  | Leningrad Oblast | Saint Petersburg     | 09-Jul-2021     | Margirova M.             | OQ078913          |
| 108. | NK1101    | CAMRU186-21  | Russia  | Leningrad Oblast | Saint Petersburg     | 12-Jul-2021     | Margirova M.             | OQ079096          |
| 109. | NK1102    | CAMRU187-21  | Russia  | Leningrad Oblast | Saint Petersburg     | 12-Jul-2021     | Margirova M.             | OQ078978          |
| 110. | NK-20-42  | GPRU091-21   | Russia  | Moscow Oblast    | Moscow suburb        | 20-Sep-2021     | Agafonova J.             | MZ329803          |
| 111. | NK55      | GRPAL1099-13 | Russia  | Moscow Oblast    | Moscow suburb        | 21-Jun-2010     | Kirichenko N.            | MW213908          |
| 112. | NK1038    | CAMRU123-21  | Russia  | Novgorod Oblast  | Veliky Novgorod      | 09-Jul-2021     | Timoshina O.             | OQ078938          |
| 113. | NK1039    | CAMRU124-21  | Russia  | Novgorod Oblast  | Veliky Novgorod      | 09-Jul-2021     | Timoshina O.             | OQ078994          |
| 114. | NK1040    | CAMRU125-21  | Russia  | Novgorod Oblast  | Veliky Novgorod      | 09-Jul-2021     | Timoshina O.             | OQ079079          |
| 115. | NK1097    | CAMRU182-21  | Russia  | Novgorod Oblast  | Veliky Novgorod      | 09-Jul-2021     | Timoshina O.             | OQ079086          |

| No.  | Sample ID | Process ID  | Country | Region           | Place           | Collection data | Collector     | GenBank Accession |
|------|-----------|-------------|---------|------------------|-----------------|-----------------|---------------|-------------------|
| 116. | NK1098    | CAMRU183-21 | Russia  | Novgorod Oblast  | Veliky Novgorod | 09-Jul-2021     | Timoshina O.  | OQ078987          |
| 117. | VA-20-1   | GPRU052-21  | Russia  | Penza Oblast     | Penza           | 26-Sep-2020     | Anikin V.V.   | OQ079091          |
| 118. | NK1020    | CAMRU105-21 | Russia  | Rostov Oblast    | Rostov-on-Don   | 14-Jul-2021     | Levchenko I.  | OQ078988          |
| 119. | NK1021    | CAMRU106-21 | Russia  | Rostov Oblast    | Rostov-on-Don   | 14-Jul-2021     | Levchenko I.  | OQ078912          |
| 120. | NK1022    | CAMRU107-21 | Russia  | Rostov Oblast    | Rostov-on-Don   | 14-Jul-2021     | Levchenko I.  | OQ078986          |
| 121. | NK1032    | CAMRU117-21 | Russia  | Rostov Oblast    | Rostov-on-Don   | 28-May-2021     | Bulgakov T.S. | OQ079026          |
| 122. | NK1033    | CAMRU118-21 | Russia  | Rostov Oblast    | Rostov-on-Don   | 28-May-2021     | Bulgakov T.S. | OQ078929          |
| 123. | NK1034    | CAMRU119-21 | Russia  | Rostov Oblast    | Rostov-on-Don   | 28-May-2021     | Bulgakov T.S. | OQ079050          |
| 124. | NK1086    | CAMRU171-21 | Russia  | Rostov Oblast    | Rostov-on-Don   | 14-Jul-2021     | Levchenko I.  | OQ078982          |
| 125. | NK1035    | CAMRU120-21 | Russia  | Rostov Oblast    | Shakhty         | 19-Jul-2021     | Bulgakov T.S. | OQ078924          |
| 126. | NK1036    | CAMRU121-21 | Russia  | Rostov Oblast    | Shakhty         | 19-Jul-2021     | Bulgakov T.S. | OQ079005          |
| 127. | NK1037    | CAMRU122-21 | Russia  | Rostov Oblast    | Shakhty         | 19-Jul-2021     | Bulgakov T.S. | OQ079065          |
| 128. | NK1093    | CAMRU178-21 | Russia  | Rostov Oblast    | Shakhty         | 20-Jul-2021     | Bulgakov T.C. | OQ078959          |
| 129. | NK1094    | CAMRU179-21 | Russia  | Rostov Oblast    | Shakhty         | 20-Jul-2021     | Bulgakov T.C. | OQ078918          |
| 130. | VA-20-13  | GPRU064-21  | Russia  | Samara Oblast    | Samara          | 17-Oct-2020     | Anikin V.     | OQ078979          |
| 131. | VA-20-14  | GPRU065-21  | Russia  | Samara Oblast    | Samara          | 17-Oct-2020     | Anikin V.     | OQ078970          |
| 132. | VA-20-15  | GPRU066-21  | Russia  | Samara Oblast    | Samara          | 17-Oct-2020     | Anikin V.     | OQ078992          |
| 133. | VA-20-3   | GPRU054-21  | Russia  | Saratovsk Oblast | Engels          | 19-Jul-2020     | Anikin V.     | OQ078967          |
| 134. | VA-20-4   | GPRU055-21  | Russia  | Saratovsk Oblast | Engels          | 19-Jul-2020     | Anikin V.     | OQ078951          |
| 135. | VA-20-24  | GPRU075-21  | Russia  | Saratovsk Oblast | Engels          | 19-Jul-2020     | Anikin V.     | OQ078946          |
| 136. | VA-20-2   | GPRU053-21  | Russia  | Saratovsk Oblast | Khvalynsk       | 19-Oct-2020     | Anikin V.     | OQ079098          |
| 137. | VA-20-8   | GPRU059-21  | Russia  | Saratovsk Oblast | Krasnoarmeysk   | 28-Jul-2020     | Anikin V.     | OQ079072          |
| 138. | VA-20-29  | GPRU080-21  | Russia  | Saratovsk Oblast | Krasnoarmeysk   | 28-Jul-2020     | Zolotuhin V.  | OQ079087          |
| 139. | VA-20-30  | GPRU081-21  | Russia  | Saratovsk Oblast | Krasnoarmeysk   | 28-Jul-2020     | Zolotuhin V.  | OQ079003          |
| 140. | VA-20-16  | GPRU067-21  | Russia  | Saratovsk Oblast | Saratov         | 15-Jul-2020     | Anikin V.     | OQ079022          |
| 141. | VA-20-17  | GPRU068-21  | Russia  | Saratovsk Oblast | Saratov         | 14-Jul-2020     | Anikin V.     | OQ078956          |
| 142. | VA-20-21  | GPRU072-21  | Russia  | Saratovsk Oblast | Saratov         | 24-Jul-2020     | Anikin V.     | OQ079041          |
| 143. | VA-20-22  | GPRU073-21  | Russia  | Saratovsk Oblast | Saratov         | 16-Sep-2020     | Anikin V.     | OQ079032          |

| No.  | Sample ID | Process ID  | Country | Region           | Place             | Collection data | Collector                | GenBank Accession |
|------|-----------|-------------|---------|------------------|-------------------|-----------------|--------------------------|-------------------|
| 144. | VA-20-5   | GPRU056-21  | Russia  | Saratovsk Oblast | Volsk             | 02-Aug-2020     | Anikin V.                | OQ078976          |
| 145. | VA-20-6   | GPRU057-21  | Russia  | Saratovsk Oblast | Volsk             | 02-Aug-2020     | Anikin V.                | OQ079035          |
| 146. | VA-20-25  | GPRU076-21  | Russia  | Saratovsk Oblast | Volsk             | 02-Aug-2020     | Anikin V.                | OQ078962          |
| 147. | NK1000    | CAMRU085-21 | Russia  | Stavropol Krai   | Georgiyevsk       | 09-Jun-2021     | Kirichenko N., Karpun N. | OQ079015          |
| 148. | NK1001    | CAMRU086-21 | Russia  | Stavropol Krai   | Georgiyevsk       | 09-Jun-2021     | Kirichenko N., Karpun N. | OQ078926          |
| 149. | NK1002    | CAMRU087-21 | Russia  | Stavropol Krai   | Georgiyevsk       | 09-Jun-2021     | Kirichenko N., Karpun N. | OQ079030          |
| 150. | NK922     | CAMRU007-21 | Russia  | Stavropol Krai   | Izobilny          | 10-Aug-2021     | Kirichenko N., Karpun N. | OQ078968          |
| 151. | NK923     | CAMRU008-21 | Russia  | Stavropol Krai   | Izobilny          | 10-Aug-2021     | Kirichenko N., Karpun N. | OQ079056          |
| 152. | NK924     | CAMRU009-21 | Russia  | Stavropol Krai   | Izobilny          | 10-Aug-2021     | Kirichenko N., Karpun N. | OQ079073          |
| 153. | NK968     | CAMRU053-21 | Russia  | Stavropol Krai   | Kislovodsk        | 11-Aug-2021     | Kirichenko N., Karpun N. | OQ079002          |
| 154. | NK969     | CAMRU054-21 | Russia  | Stavropol Krai   | Kislovodsk        | 11-Aug-2021     | Kirichenko N., Karpun N. | OQ079021          |
| 155. | NK970     | CAMRU055-21 | Russia  | Stavropol Krai   | Kislovodsk        | 11-Aug-2021     | Kirichenko N., Karpun N. | OQ079108          |
| 156. | NK947     | CAMRU032-21 | Russia  | Stavropol Krai   | Mineralnye Vody   | 10-Aug-2021     | Kirichenko N., Karpun N. | OQ079062          |
| 157. | NK948     | CAMRU033-21 | Russia  | Stavropol Krai   | Mineralnye Vody   | 10-Aug-2021     | Kirichenko N., Karpun N. | OQ079009          |
| 158. | NK949     | CAMRU034-21 | Russia  | Stavropol Krai   | Mineralnye Vody   | 10-Aug-2021     | Kirichenko N., Karpun N. | OQ079107          |
| 159. | NK934     | CAMRU019-21 | Russia  | Stavropol Krai   | Nevinnomyssk      | 10-Aug-2021     | Kirichenko N., Karpun N. | OQ079020          |
| 160. | NK935     | CAMRU020-21 | Russia  | Stavropol Krai   | Nevinnomyssk      | 10-Aug-2021     | Kirichenko N., Karpun N. | OQ078928          |
| 161. | NK936     | CAMRU021-21 | Russia  | Stavropol Krai   | Nevinnomyssk      | 10-Aug-2021     | Kirichenko N., Karpun N. | OQ078949          |
| 162. | NK937     | CAMRU022-21 | Russia  | Stavropol Krai   | Nevinnomyssk      | 10-Aug-2021     | Kirichenko N., Karpun N. | OQ078989          |
| 163. | NK995     | CAMRU080-21 | Russia  | Stavropol Krai   | Nevinnomyssk      | 10-Aug-2021     | Kirichenko N., Karpun N. | OQ079067          |
| 164. | NK996     | CAMRU081-21 | Russia  | Stavropol Krai   | Nevinnomyssk      | 10-Aug-2021     | Kirichenko N., Karpun N. | OQ078915          |
| 165. | NK925     | CAMRU010-21 | Russia  | Stavropol Krai   | Novoaleksandrovsk | 10-Aug-2021     | Kirichenko N., Karpun N. | OQ079057          |
| 166. | NK926     | CAMRU011-21 | Russia  | Stavropol Krai   | Novoaleksandrovsk | 10-Aug-2021     | Kirichenko N., Karpun N. | OQ078935          |
| 167. | NK927     | CAMRU012-21 | Russia  | Stavropol Krai   | Novoaleksandrovsk | 10-Aug-2021     | Kirichenko N., Karpun N. | OQ078961          |
| 168. | NK944     | CAMRU029-21 | Russia  | Stavropol Krai   | Pyatigorsk        | 10-Aug-2021     | Kirichenko N., Karpun N. | OQ079051          |
| 169. | NK945     | CAMRU030-21 | Russia  | Stavropol Krai   | Pyatigorsk        | 10-Aug-2021     | Kirichenko N., Karpun N. | OQ079014          |
| 170. | NK946     | CAMRU031-21 | Russia  | Stavropol Krai   | Pyatigorsk        | 10-Aug-2021     | Kirichenko N., Karpun N. | OQ079103          |
| 171. | NK992     | CAMRU077-21 | Russia  | Stavropol Krai   | Stavropol         | 08-Aug-2021     | Lemeshko V.              | OQ078957          |

| No.  | Sample ID | Process ID  | Country | Region           | Place        | Collection data | Collector    | GenBank Accession |
|------|-----------|-------------|---------|------------------|--------------|-----------------|--------------|-------------------|
| 172. | NK993     | CAMRU078-21 | Russia  | Stavropol Krai   | Stavropol    | 08-Aug-2021     | Lemeshko V.  | OQ078944          |
| 173. | NK994     | CAMRU079-21 | Russia  | Stavropol Krai   | Stavropol    | 08-Aug-2021     | Lemeshko V.  | OQ079034          |
| 174. | NK1026    | CAMRU111-21 | Russia  | Tula Oblast      | Tula         | 24-Jul-2021     | Kosheleva S. | OQ078936          |
| 175. | NK1027    | CAMRU112-21 | Russia  | Tula Oblast      | Tula         | 24-Jul-2021     | Kosheleva S. | OQ079076          |
| 176. | NK1028    | CAMRU113-21 | Russia  | Tula Oblast      | Tula         | 24-Jul-2021     | Kosheleva S. | OQ078922          |
| 177. | NK1087    | CAMRU172-21 | Russia  | Tula Oblast      | Tula         | 24-Jul-2021     | Kosheleva S. | OQ079036          |
| 178. | NK1088    | CAMRU173-21 | Russia  | Tula Oblast      | Tula         | 24-Jul-2021     | Kosheleva S. | OQ079012          |
| 179. | NK-20-44  | GPRU093-21  | Russia  | Ulyanovsk Oblast | Dimitrovgrad | 26-Sep-2020     | Sivakov V.   | OQ078939          |
| 180. | NK-20-45  | GPRU094-21  | Russia  | Ulyanovsk Oblast | Dimitrovgrad | 26-Sep-2020     | Sivakov V.   | OQ079024          |
| 181. | NK-20-46  | GPRU095-21  | Russia  | Ulyanovsk Oblast | Dimitrovgrad | 26-Sep-2020     | Sivakov V.   | OQ078931          |
| 182. | VA-20-9   | GPRU060-21  | Russia  | Ulyanovsk Oblast | Dimitrovgrad | 20-Oct-2020     | Sivakov V.   | OQ079054          |
| 183. | VA-20-31  | GPRU082-21  | Russia  | Ulyanovsk Oblast | Dimitrovgrad | 20-Oct-2020     | Zolotuhin V. | OQ079048          |
| 184. | VA-20-32  | GPRU083-21  | Russia  | Ulyanovsk Oblast | Dimitrovgrad | 20-Oct-2020     | Zolotuhin V. | OQ078941          |
| 185. | VZ-20-05  | GPRU039-21  | Russia  | Ulyanovsk Oblast | Dimitrovgrad | 26-Sep-2020     | Sivakov V.   | OQ078923          |
| 186. | VZ-20-06  | GPRU040-21  | Russia  | Ulyanovsk Oblast | Dimitrovgrad | 26-Sep-2020     | Sivakov V.   | OQ079061          |
| 187. | VZ-20-01  | GPRU035-21  | Russia  | Ulyanovsk Oblast | Inza         | 02-Sep-2020     | Ladonina D.  | OQ079052          |
| 188. | VZ-20-03  | GPRU037-21  | Russia  | Ulyanovsk Oblast | Inza         | 26-Sep-2020     | Ladonina D.  | OQ079059          |
| 189. | VZ-20-04  | GPRU038-21  | Russia  | Ulyanovsk Oblast | Inza         | 29-Sep-2020     | Ladonina D.  | OQ079013          |
| 190. | VZ-20-07  | GPRU041-21  | Russia  | Ulyanovsk Oblast | Karsun       | 26-Sep-2020     | Zolotuhin V. | OQ079004          |
| 191. | VA-20-10  | GPRU061-21  | Russia  | Ulyanovsk Oblast | Ulyanovsk    | 20-Sep-2020     | Zolotuhin V. | OQ079008          |
| 192. | VA-20-11  | GPRU062-21  | Russia  | Ulyanovsk Oblast | Ulyanovsk    | 20-Sep-2020     | Zolotuhin V. | OQ078975          |
| 193. | VA-20-12  | GPRU063-21  | Russia  | Ulyanovsk Oblast | Ulyanovsk    | 20-Sep-2020     | Zolotuhin V. | OQ079092          |
| 194. | VA-20-26  | GPRU077-21  | Russia  | Ulyanovsk Oblast | Ulyanovsk    | 20-Sep-2020     | Zolotuhin V. | OQ078996          |
| 195. | VA-20-27  | GPRU078-21  | Russia  | Ulyanovsk Oblast | Ulyanovsk    | 20-Sep-2020     | Zolotuhin V. | OQ079090          |
| 196. | VA-20-28  | GPRU079-21  | Russia  | Ulyanovsk Oblast | Ulyanovsk    | 20-Sep-2020     | Zolotuhin V. | OQ078973          |
| 197. | NK1014    | CAMRU099-21 | Russia  | Yaroslavl Oblast | Yaroslavl    | 20-Jul-2021     | Vlasov D.    | OQ078945          |
| 198. | NK1015    | CAMRU100-21 | Russia  | Yaroslavl Oblast | Yaroslavl    | 20-Jul-2021     | Vlasov D.    | OQ078960          |
| 199. | NK1016    | CAMRU101-21 | Russia  | Yaroslavl Oblast | Yaroslavl    | 20-Jul-2021     | Vlasov D.    | OQ078974          |



| No.                                                | Sample ID      | Process ID  | Country   | Region            | Place                | Collection data | Collector                         | GenBank Accession |
|----------------------------------------------------|----------------|-------------|-----------|-------------------|----------------------|-----------------|-----------------------------------|-------------------|
| 200.                                               | NK1082         | CAMRU167-21 | Russia    | Yaroslavl Oblast  | Yaroslavl            | 20-Jul-2021     | Vlasov D.                         | OQ079018          |
| 201.                                               | NK1083         | CAMRU168-21 | Russia    | Yaroslavl Oblast  | Yaroslavl            | 20-Jul-2021     | Vlasov D.                         | OQ079099          |
| <b>Sequences borrowed from BOLD for comparison</b> |                |             |           |                   |                      |                 |                                   |                   |
| 202.                                               | BIOUG36740-C07 | GMBMN825-17 | Belarus   | Minskaya Voblasts | Minsk                | 07-Jul-2016     | Lipinskaya T.                     | MW214209          |
| 203.                                               | BIOUG36740-H05 | GMBMN883-17 | Belarus   | Minskaya Voblasts | Minsk                | 07-Jul-2016     | Lipinskaya T.                     | MW214334          |
| 204.                                               | RV15d          | CAMER019-07 | France    |                   | Mezieres les clery   | 20-Sep-2005     | Garcia J.                         | GQ144274          |
| 205.                                               | CCDB-02228-H06 | MICOW283-10 | Greece    | Thessaly          | Larisa               | 06-Jun-2008     | Lopez-Vaamonde C.,<br>Augustin S. | HM379297          |
| 206.                                               | RV68           | CAMER040-07 | Hungary   |                   | Borjad               | 03-Dec-2006     | Wagner M.                         | GQ144278          |
| 207.                                               | DLCO112        | LNOUD191-11 | Macedonia |                   |                      | 01-Aug-1985     | Deschka G.                        | KX044715          |
| <b>Outgroup</b>                                    |                |             |           |                   |                      |                 |                                   |                   |
| 208.                                               | NK529          | SIBLE018-17 | Russia    | Primorskiy Krai   | Gornotaejnoe village | 25-Jul-2016     | Kirichenko N.                     | MK403719          |
| 209.                                               | NK537          | SIBLE026-17 | Russia    | Primorskiy Krai   | Gornotaejnoe village | 22-Jul-2016     | Kirichenko N.                     | MK403685          |
